# Supplementary material
Source: MDPI journal article supplement (https://www.mdpi.com/2073-4433/13/1/120)
Supplement: s1 [file s1]

# Supplementary Materials: Spatio-temporal characteristics and variation pattern of the atmospheric particulate matter concentration: A case study of the Beijing–Tianjin–Hebei region, China

Haoran Zhai <sup>1,2</sup>, Jiaqi Yao <sup>1,3,\*</sup>, Guanghui Wang <sup>1,4</sup>, Xinming Tang <sup>1,3</sup>

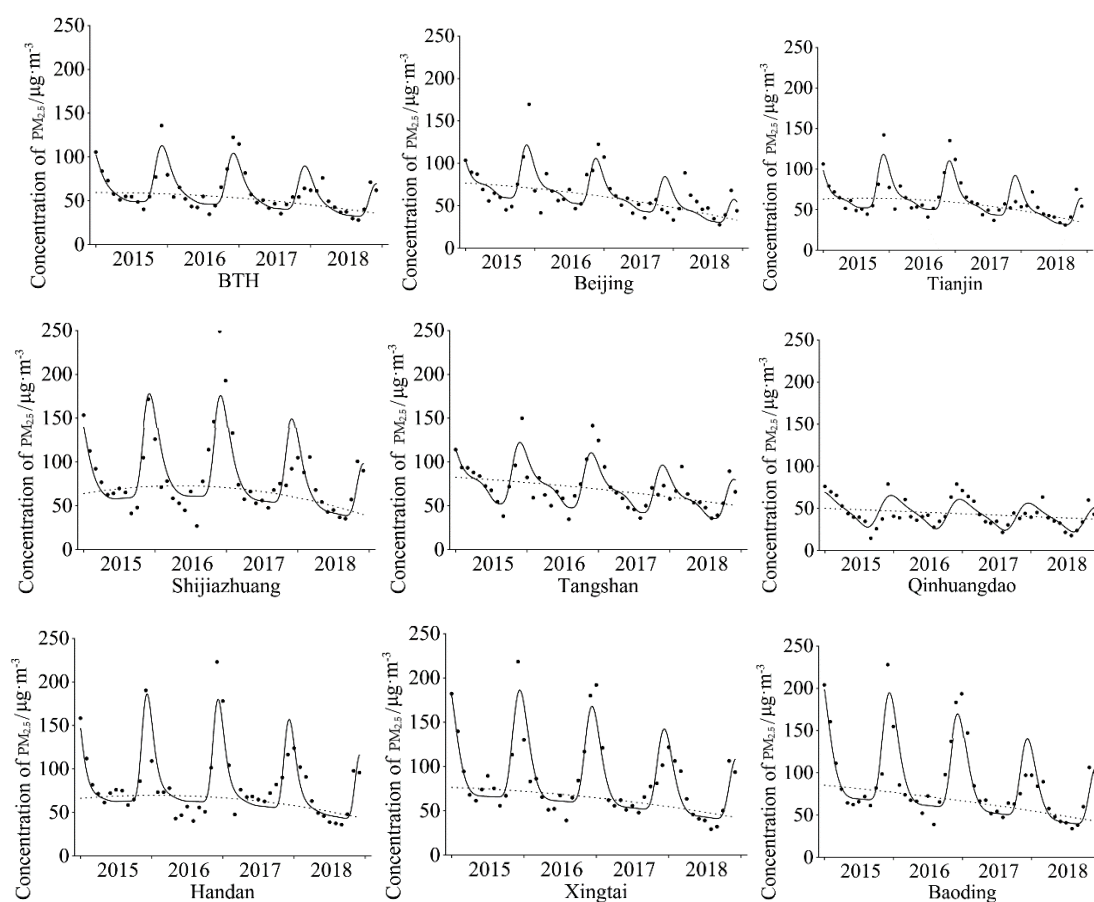

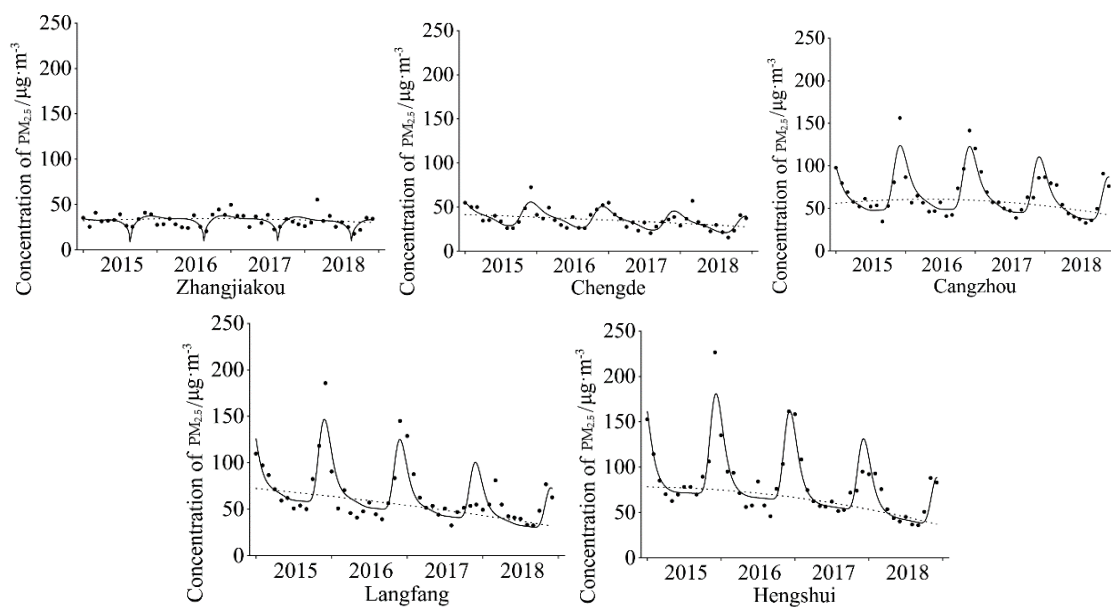

(a)

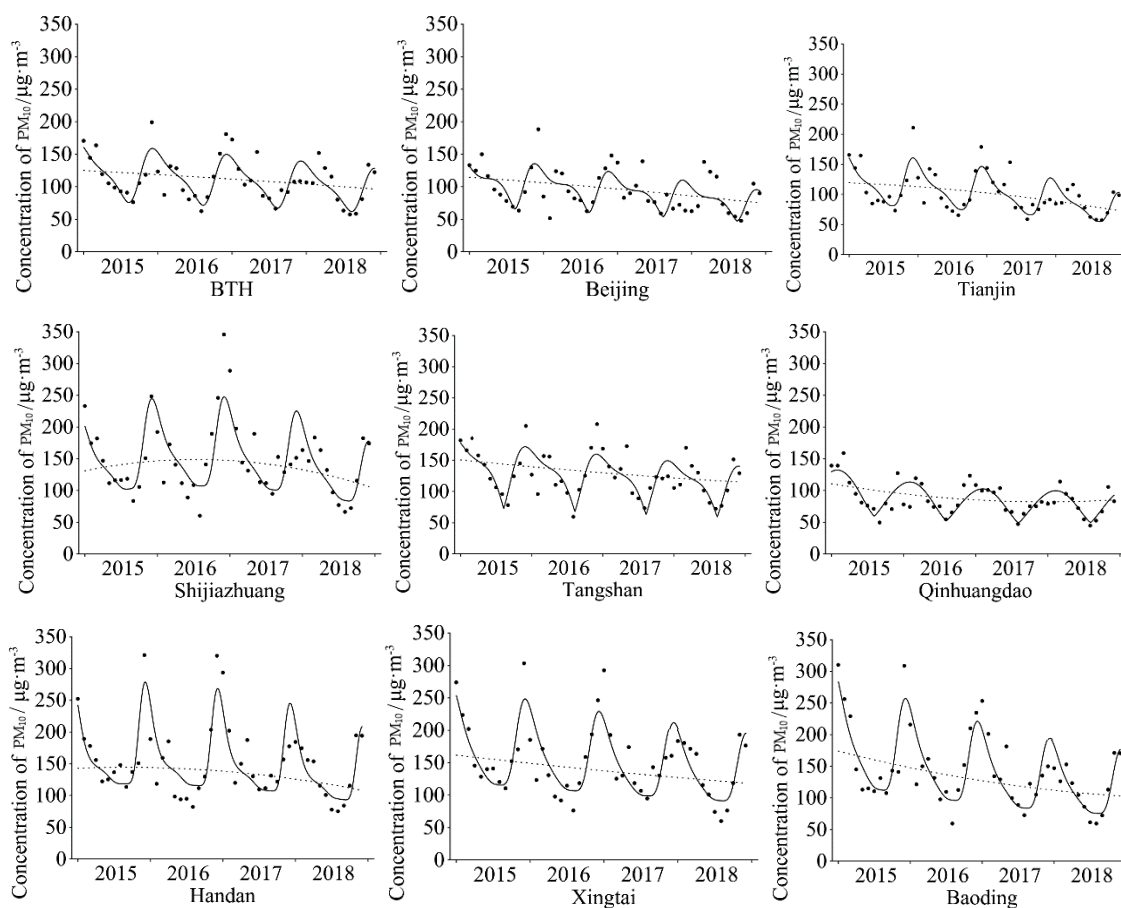

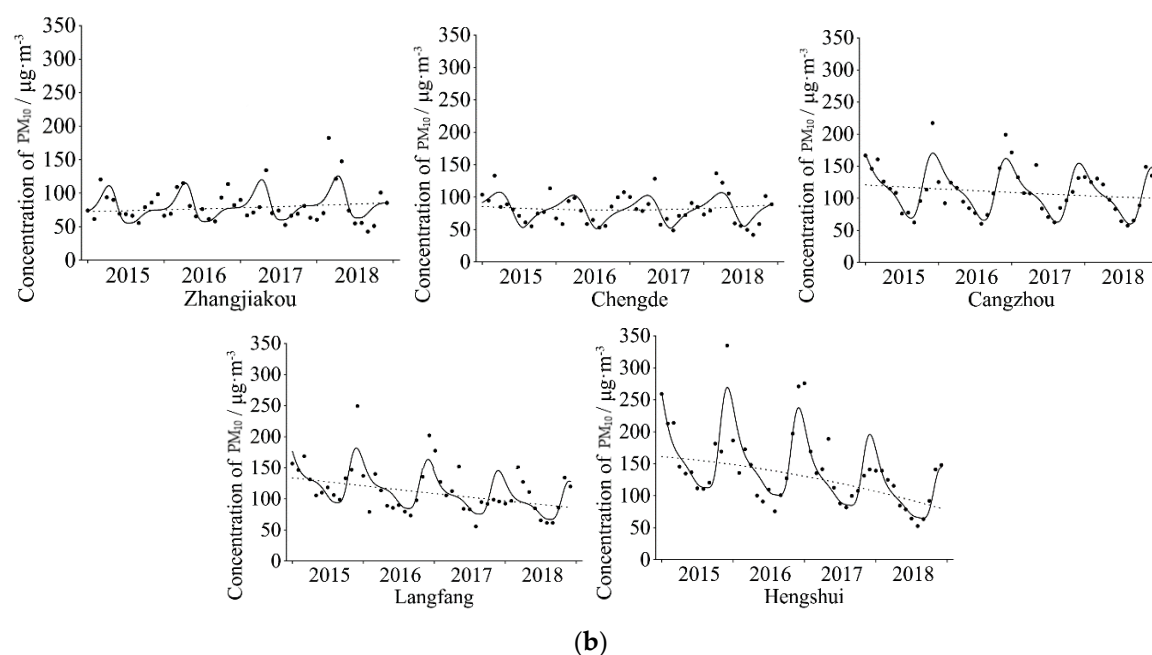

**Figure S1.** Fitting results of monthly PM<sub>2.5</sub> (a) and PM<sub>10</sub> (b) concentration.

**Table S1.** Fitting parameters of PM<sub>2.5</sub> and PM<sub>10</sub> concentration.

|                   |              | R <sup>2</sup> | mean<br>concentration | A <sub>t</sub> | B <sub>t</sub> | turning point | Overall trend         | Average<br>monthly<br>variation | C <sub>t</sub> | D <sub>t</sub> | E <sub>t</sub> | F <sub>t</sub> | G <sub>t</sub> | H <sub>t</sub> |
|-------------------|--------------|----------------|-----------------------|----------------|----------------|---------------|-----------------------|---------------------------------|----------------|----------------|----------------|----------------|----------------|----------------|
| PM <sub>2.5</sub> | BTH          | 0.74           | 59.93                 | -0.0088        | 0.01           | 2014.12       | descend rapidly       | -0.42                           | 49.56          | 1.33           | 12             | 2.73           | 1.94           | 1.14           |
|                   | Beijing      | 0.50           | 64.45                 | -0.0092        | -0.30          | before 2015   | descend rapidly       | -0.76                           | 62.58          | 1.11           | 12             | 2.24           | 2.08           | 1.72           |
|                   | Tianjin      | 0.67           | 62.59                 | -0.0155        | 0.26           | 2015.08       | rise and then descend | -0.50                           | 51.42          | 1.26           | 12             | 2.49           | 1.80           | 1.59           |
|                   | Shijiazhuang | 0.67           | 83.21                 | -0.0290        | 0.99           | 2016.05       | rise and then descend | -0.43                           | 52.84          | 1.94           | 12             | 3.35           | 2.04           | 0.89           |
|                   | Tangshan     | 0.64           | 71.34                 | -0.0034        | -0.29          | before 2015   | descend rapidly       | -0.46                           | 55.11          | 1.39           | 12             | 1.45           | 1.91           | 1.64           |
|                   | Qinhuangdao  | 0.56           | 43.65                 | 0.0000         | -0.16          | after 2018    | uniform descent       | -0.16                           | 29.14          | 1.41           | 12             | 0.94           | 1.50           | 1.03           |
|                   | Handan       | 0.77           | 81.71                 | -0.0198        | 0.54           | 2016.01       | rise and then descend | -0.43                           | 59.90          | 1.93           | 12             | 4.32           | 1.69           | 1.34           |
|                   | Xingtai      | 0.81           | 84.57                 | -0.0089        | -0.20          | before 2015   | descend rapidly       | -0.64                           | 68.07          | 1.90           | 12             | 3.90           | 2.14           | 0.59           |
|                   | Baoding      | 0.81           | 87.51                 | -0.0048        | -0.53          | before 2015   | descend rapidly       | -0.77                           | 73.17          | 1.96           | 12             | 3.48           | 2.08           | 0.64           |
|                   | Zhangjiakou  | 0.18           | 32.26                 | -0.0007        | 0.03           | 2016.08       | rise and then descend | -0.01                           | 3.90           | 8.00           | 12             | 0.15           | 1.83           | 1.91           |
|                   | Chengde      | 0.59           | 36.33                 | -0.0010        | -0.16          | before 2015   | descend rapidly       | -0.21                           | 30.49          | 0.97           | 12             | 1.37           | 1.85           | 1.38           |
|                   | Cangzhou     | 0.76           | 65.81                 | -0.0154        | 0.52           | 2016.04       | rise and then descend | -0.23                           | 44.65          | 1.55           | 12             | 2.69           | 1.88           | 1.28           |
| PM <sub>10</sub>  | Langfang     | 0.67           | 65.40                 | -0.0038        | -0.56          | before 2015   | descend rapidly       | -0.75                           | 63.65          | 1.60           | 12             | 3.45           | 1.96           | 1.45           |
|                   | Hengshui     | 0.84           | 81.42                 | -0.0157        | -0.04          | before 2015   | descend rapidly       | -0.81                           | 72.80          | 1.59           | 12             | 4.39           | 1.94           | 0.99           |
|                   | BTH          | 0.58           | 110.82                | -0.0015        | -0.30          | before 2015   | descend rapidly       | -0.38                           | 78.13          | 1.14           | 12             | 0.92           | 1.79           | 1.28           |
|                   | Beijing      | 0.32           | 94.64                 | -0.0023        | -0.39          | before 2015   | descend rapidly       | -0.50                           | 69.11          | 1.11           | 12             | 0.73           | 2.03           | 1.89           |
|                   | Tianjin      | 0.56           | 102.97                | -0.0085        | -0.28          | before 2015   | descend rapidly       | -0.69                           | 84.06          | 1.02           | 12             | 1.26           | 1.71           | 1.44           |
|                   | Shijiazhuang | 0.56           | 148.19                | -0.0377        | 1.46           | 2016.07       | rise and then descend | -0.38                           | 92.88          | 1.33           | 12             | 1.77           | 1.86           | 1.28           |
|                   | Tangshan     | 0.57           | 126.68                | 0.0024         | -0.50          | after 2018    | descend slowly        | -0.38                           | 76.68          | 1.42           | 12             | 0.53           | 1.89           | 1.41           |
|                   | Qinhuangdao  | 0.64           | 86.75                 | 0.0134         | -0.98          | 2017.12       | descend and then rise | -0.32                           | 66.71          | 1.04           | 12             | 0.61           | 0.82           | -0.10          |
|                   | Handan       | 0.68           | 152.86                | -0.0194        | 0.34           | 2015.08       | rise and then descend | -0.61                           | 116.99         | 1.36           | 12             | 2.64           | 1.63           | 1.55           |
|                   | Xingtai      | 0.68           | 151.25                | 0.0029         | -0.83          | after 2018    | descend slowly        | -0.69                           | 122.46         | 1.20           | 12             | 1.87           | 1.92           | 0.98           |
|                   | Baoding      | 0.72           | 144.34                | 0.0138         | -1.75          | after 2018    | descend slowly        | -1.08                           | 125.92         | 1.41           | 12             | 1.82           | 1.82           | 1.06           |
|                   | Zhangjiakou  | 0.34           | 81.62                 | 0.0013         | 0.14           | before 2015   | rise rapidly          | 0.21                            | 54.31          | 1.02           | 12             | 1.62           | 0.11           | -1.91          |
|                   | Chengde      | 0.42           | 81.31                 | 0.0080         | -0.36          | 2016.10       | descend and then rise | 0.03                            | 55.23          | 1.00           | 12             | 0.83           | 0.31           | -1.34          |
